# Supplementary material
Source: PubMed Central journal article supplement (PMC8101359)
Supplement: GCH2-5-2000101-s001.pdf [file GCH2-5-2000101-s001.pdf]

# Global Challenges

---

Open Access

## Supporting Information

for *Global Challenges*, DOI: 10.1002/gch2.202000101

Understanding Infection Progression under Strong  
Control Measures through Universal COVID-19 Growth  
Signatures

*Magdalena Djordjevic,\* Marko Djordjevic,\* Bojana Ilic,  
Stefan Stojku, and Igor Salom*

For each Figure, the caption is equivalent to Fig. 1 in the manuscript.

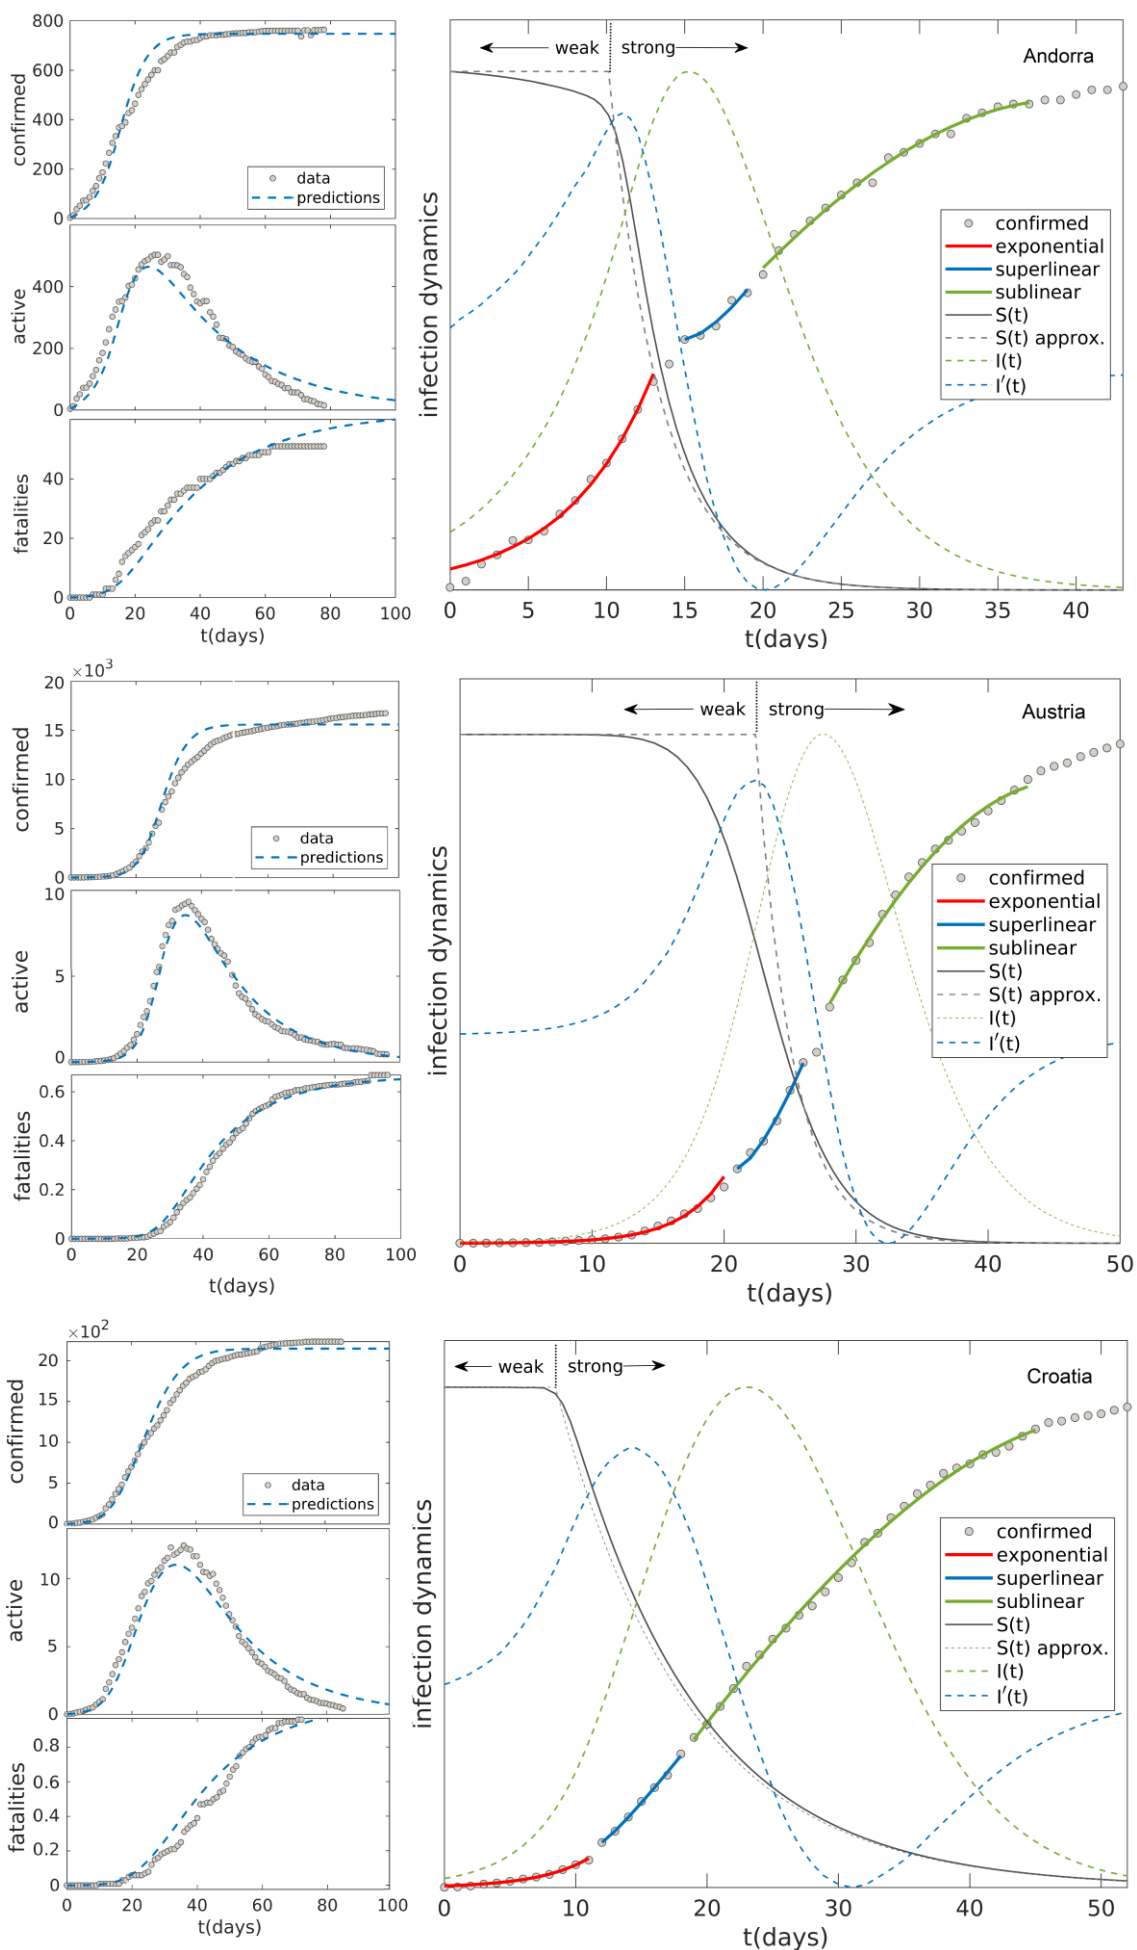

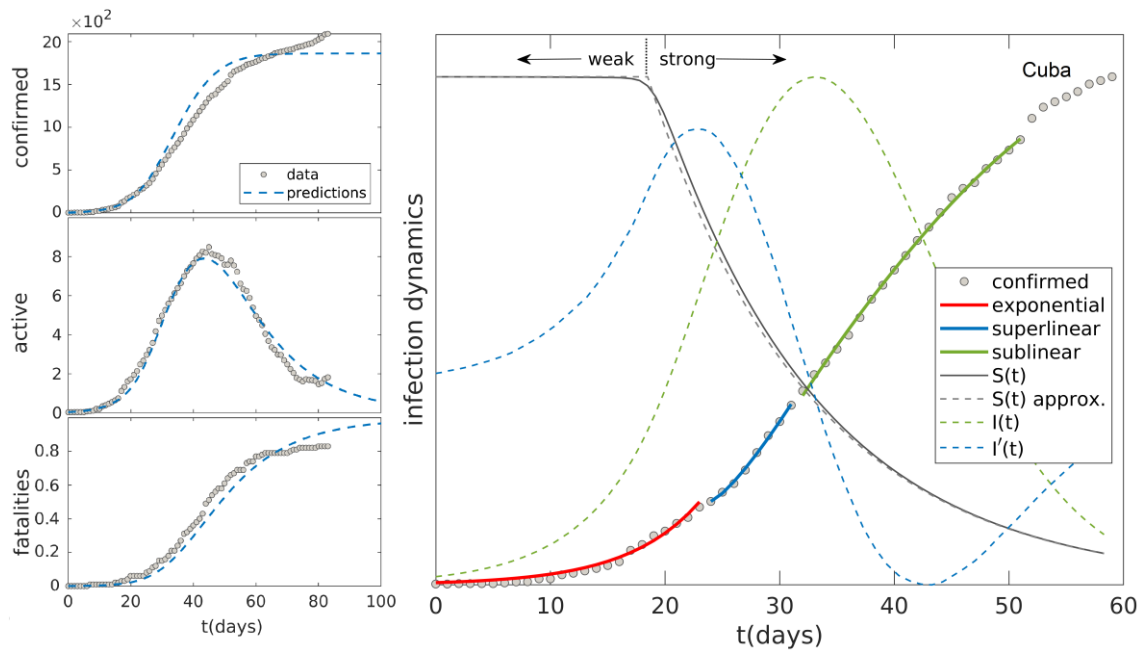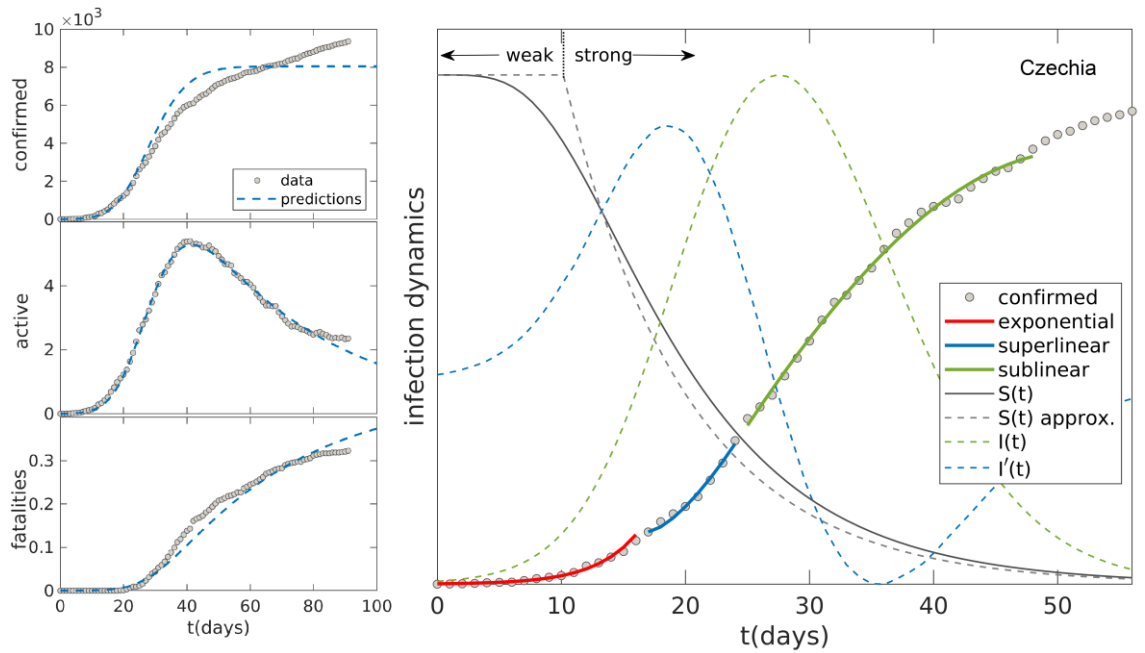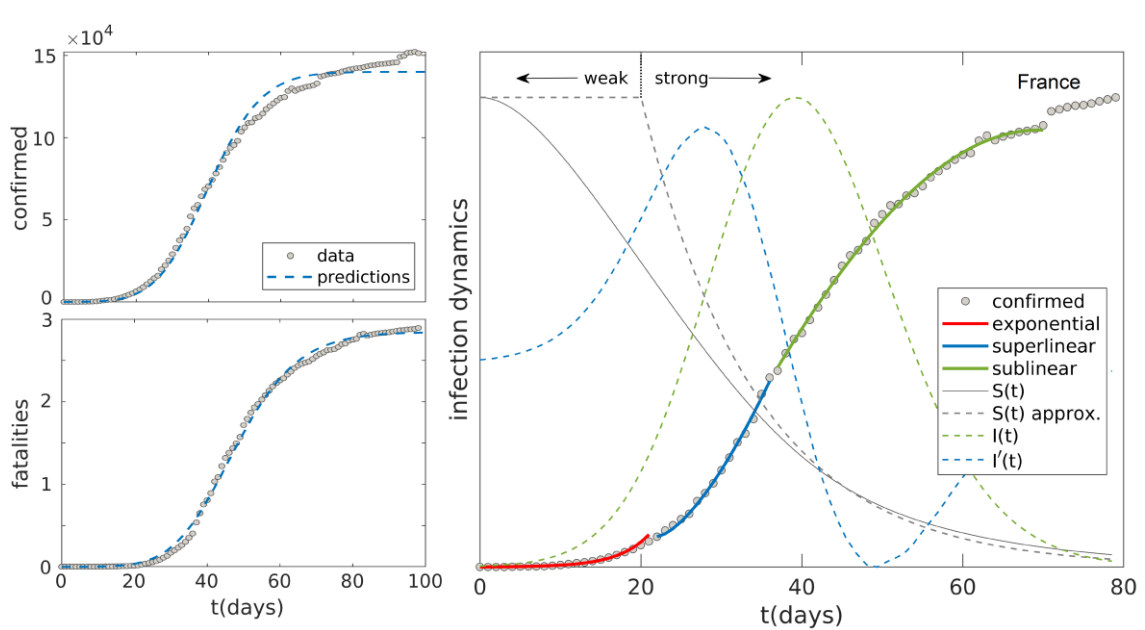

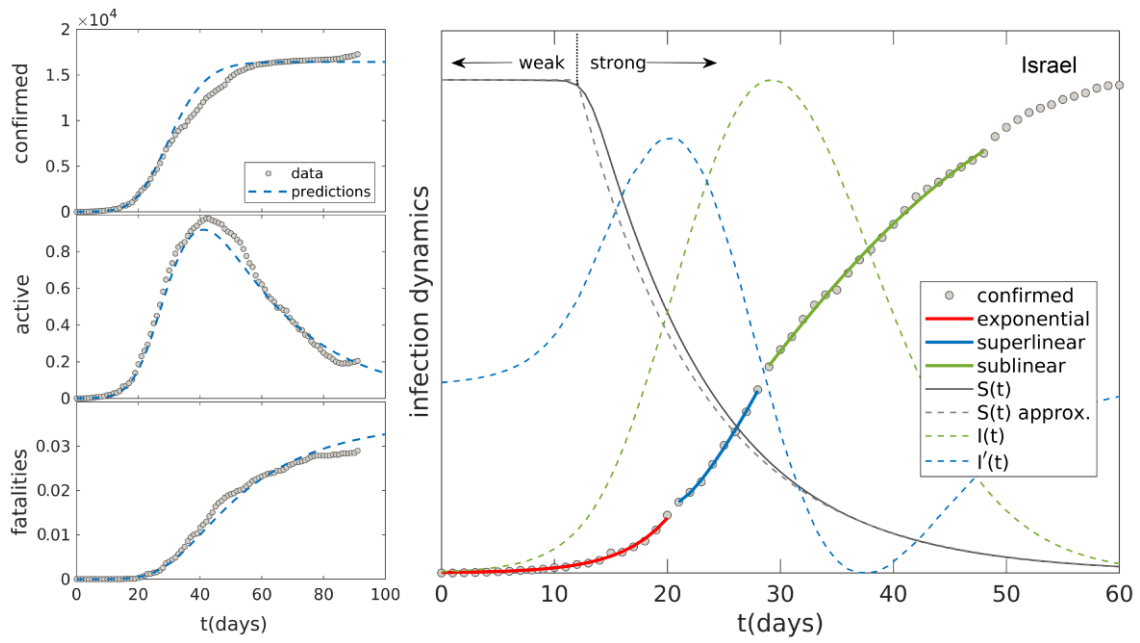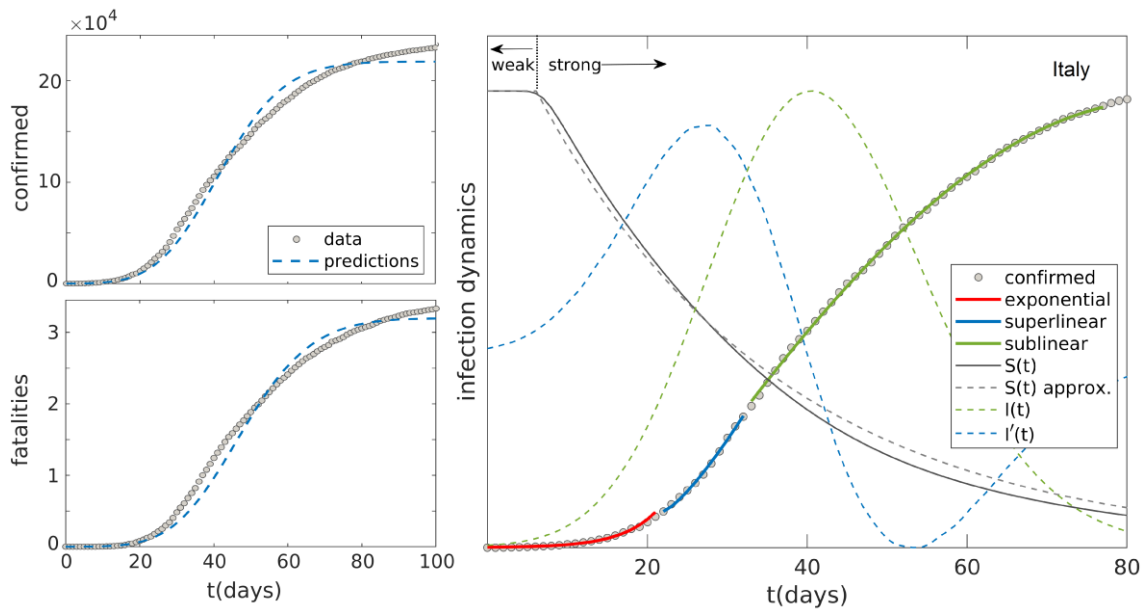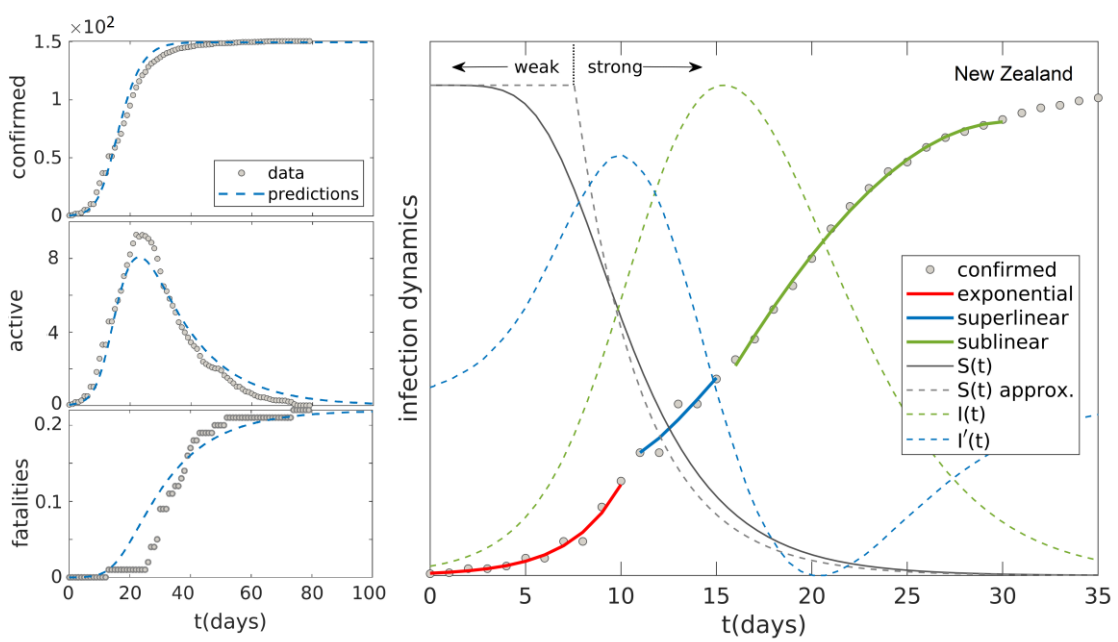

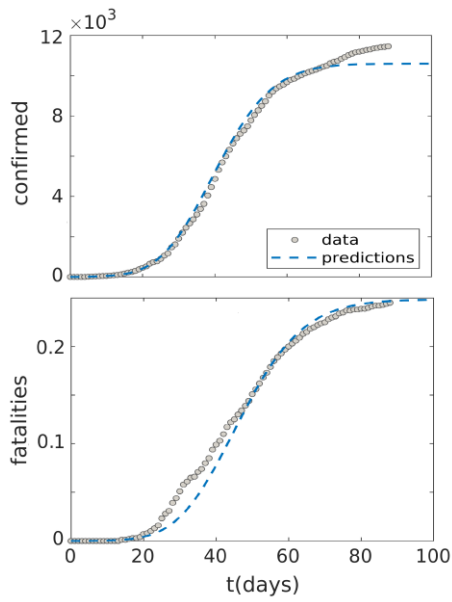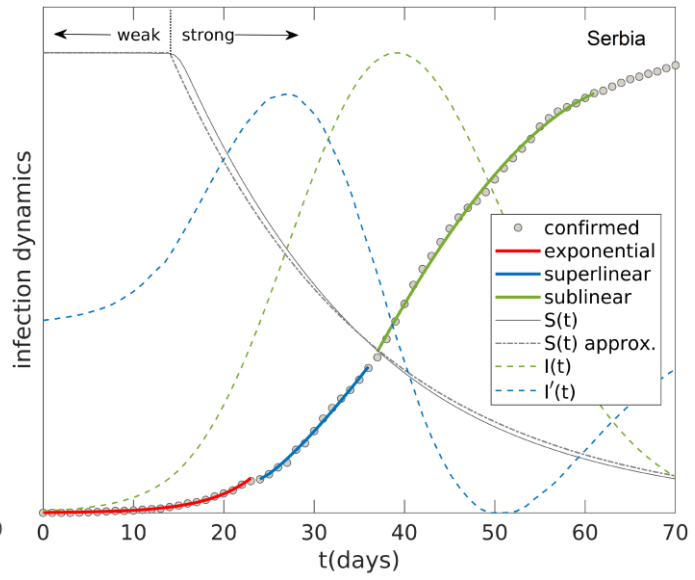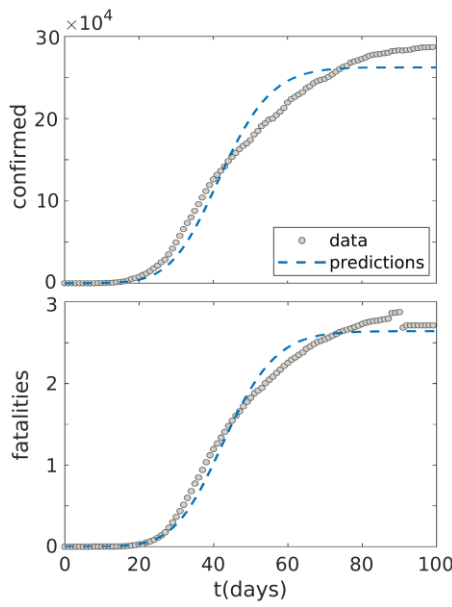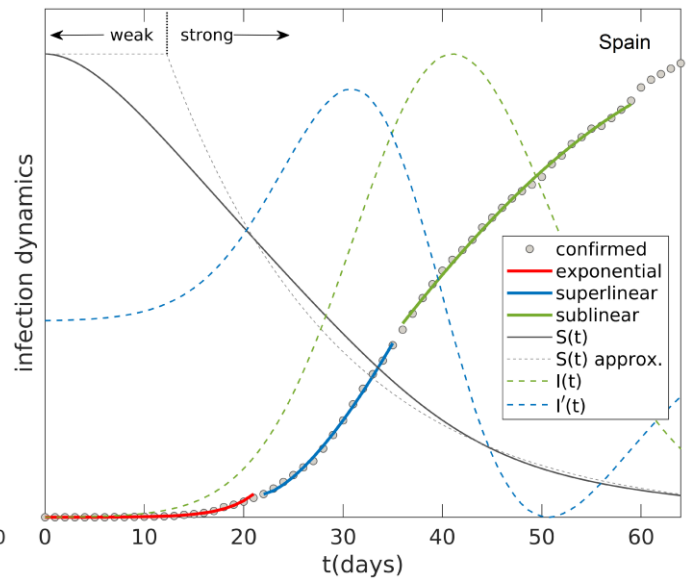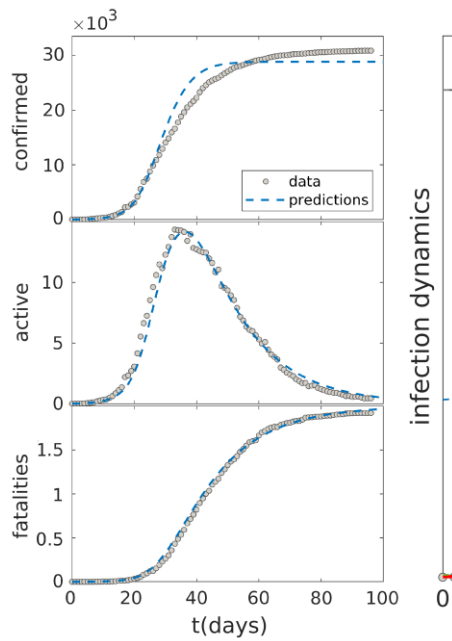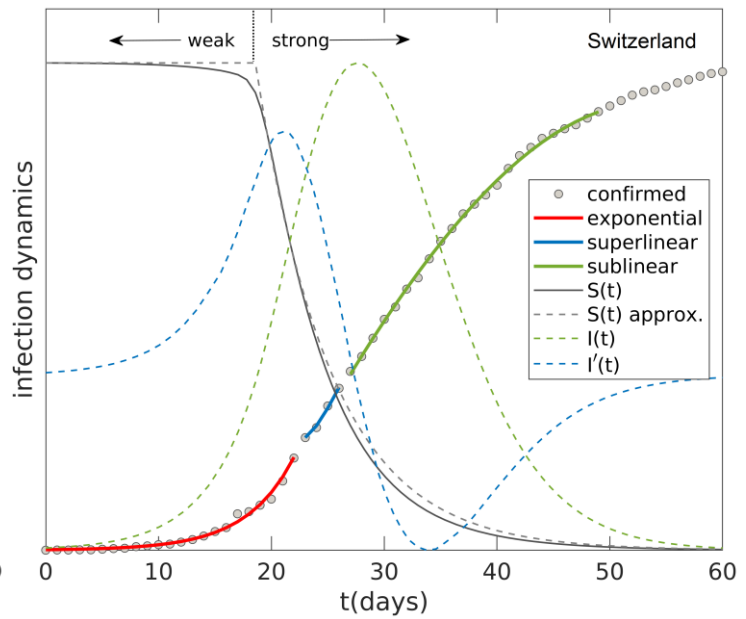

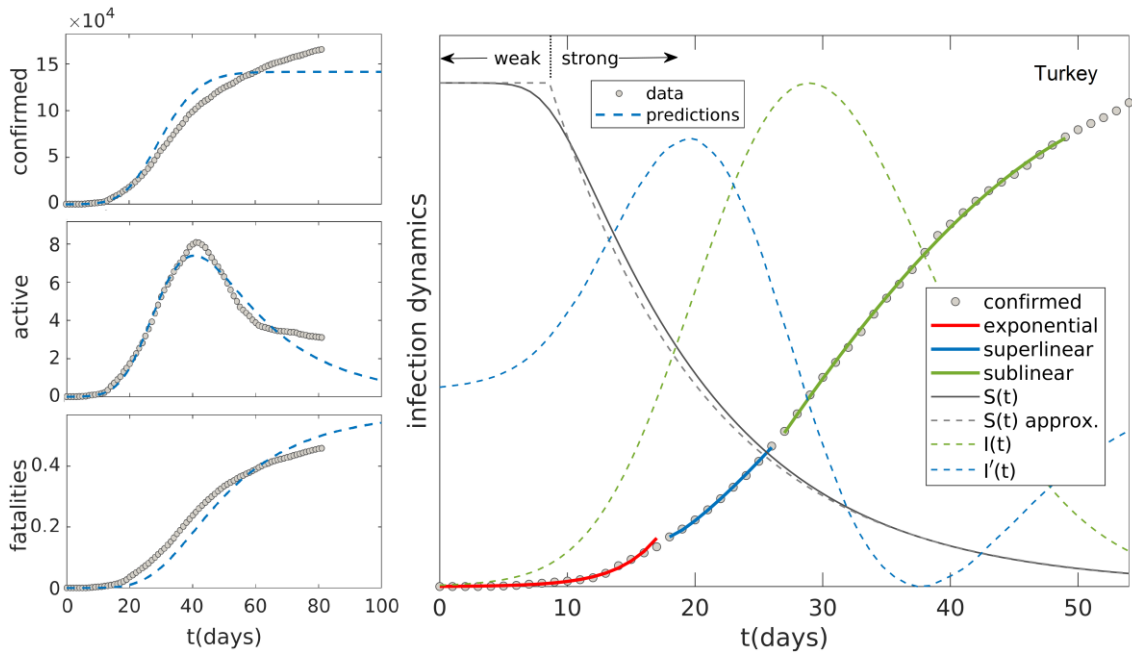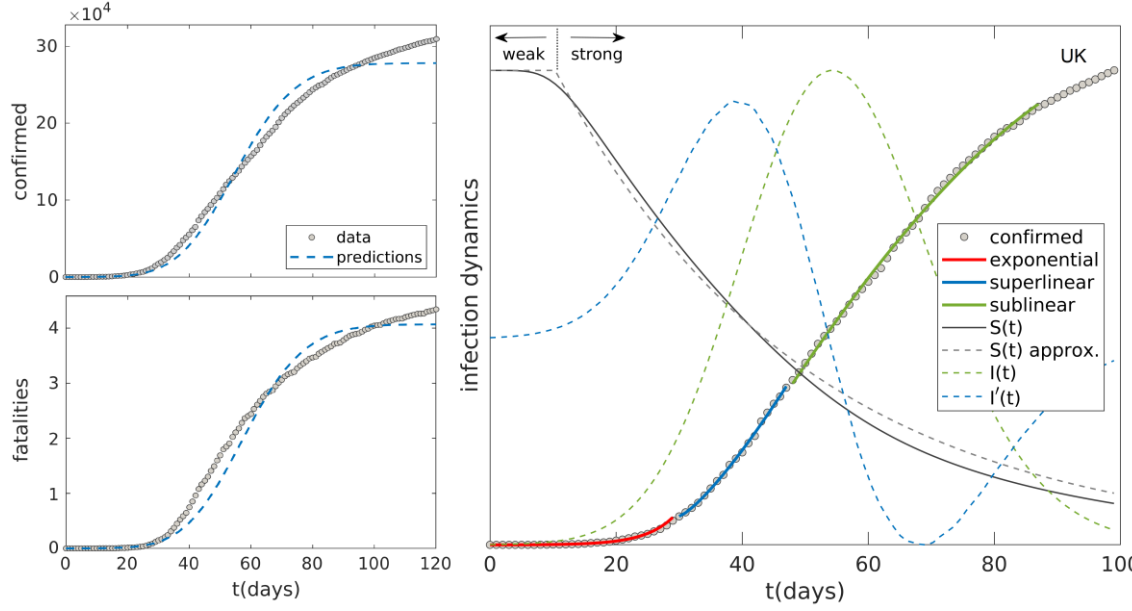

| Country | $\alpha$ range | $\alpha$      | IFR (%)     | CFR (%)   | AR (%)    | $\Delta t$ (days) | $\nu$       | $R_0$     |
|---------|----------------|---------------|-------------|-----------|-----------|-------------------|-------------|-----------|
| AND     | 0.03 → 0.33    | 0.3 ± 0.1     | 0.6 ± 0.2   | 8.4 ± 0.8 | 13 ± 3    | 5 ± 1             | 1.4 ± 0.6   | 2.5 ± 0.3 |
| AT      | 0 → 0.44       | 0.4 ± 0.1     | 0.7 ± 0.3   | 4.3 ± 0.5 | 1 ± 1     | 6 ± 2             | 1.4 ± 0.2   | 3.7 ± 0.6 |
| CH      | 0.02 → 0.17    | 0.15 ± 0.05   | 0.2 ± 0.3   | 7.0 ± 0.7 | 12 ± 5    | 4 ± 2             | 1.27 ± 0.09 | 3.3 ± 0.4 |
| CRO     | 0.02 → 0.11    | 0.10 ± 0.03   | 0.4 ± 0.3   | 5.0 ± 0.5 | 0.8 ± 0.7 | 7 ± 3             | 1.1 ± 0.1   | 3.5 ± 0.6 |
| CU      | 0.02 → 0.14    | 0.07 ± 0.03   | 0.1 ± 0.1   | 5.4 ± 0.6 | 1.4 ± 0.6 | 8 ± 2             | 1.3 ± 0.1   | 2.4 ± 0.9 |
| CZ      | 0.02 → 0.16    | 0.10 ± 0.02   | 0.2 ± 0.3   | 5.8 ± 0.8 | 2 ± 4     | 8 ± 1             | 1.5 ± 0.2   | 4.0 ± 0.8 |
| DE      | 0.02 → 0.17    | 0.07 ± 0.02   | 0.3 ± 0.2   | 5.1 ± 0.6 | 4 ± 3     | 8 ± 1             | 1.5 ± 0.1   | 3.7 ± 0.7 |
| ESP     | 0.01 → 0.07    | 0.06 ± 0.01   | 0.4 ± 0.1   | 10 ± 1    | 16 ± 7    | 13 ± 3            | 1.47 ± 0.06 | 4.6 ± 0.4 |
| FR      | 0.02 → 0.14    | 0.07 ± 0.02   | 0.4 ± 0.5   | 20 ± 2    | 12 ± 8    | 14 ± 3            | 1.51 ± 0.08 | 3.6 ± 0.6 |
| IL      | 0 → 0.16       | 0.09 ± 0.02   | 0.13 ± 0.07 | 2.2 ± 0.2 | 3 ± 2     | 8 ± 2             | 1.3 ± 0.1   | 3.8 ± 0.9 |
| IT      | 0.01 → 0.033   | 0.033 ± 0.005 | 0.7 ± 0.7   | 15 ± 2    | 8 ± 9     | 10 ± 3            | 1.29 ± 0.08 | 3.2 ± 0.5 |
| NZ      | 0.04 → 1.      | 0.30 ± 0.07   | 0.3 ± 0.1   | 1.5 ± 0.1 | 0.2 ± 0.1 | 5 ± 1             | 1 ± 1       | 5 ± 2     |
| SRB     | 0.02 → 0.11    | 0.04 ± 0.01   | 0.08 ± 0.05 | 2.3 ± 0.2 | 5 ± 4     | 12 ± 3            | 1.23 ± 0.07 | 2.9 ± 0.3 |
| TR      | 0.01 → 0.12    | 0.08 ± 0.01   | 0.4 ± 0.1   | 4.1 ± 0.5 | 2 ± 1     | 9 ± 3             | 1.23 ± 0.05 | 4 ± 2     |
| UK      | 0.01 → 0.03    | 0.025 ± 0.005 | 0.7 ± 0.2   | 15 ± 2    | 9 ± 5     | 17 ± 3            | 1.27 ± 0.04 | 3.1 ± 0.2 |

**Table S1:** Notations in the table follow those in Figures 1-3.
